# Supplementary material
Source: PubMed Central journal article supplement (PMC7223064)
Supplement: 41390_2019_697_MOESM1_ESM.pdf [file 41390_2019_697_MOESM1_ESM.pdf]

## Supplemental Figure S1: Patient enrollment

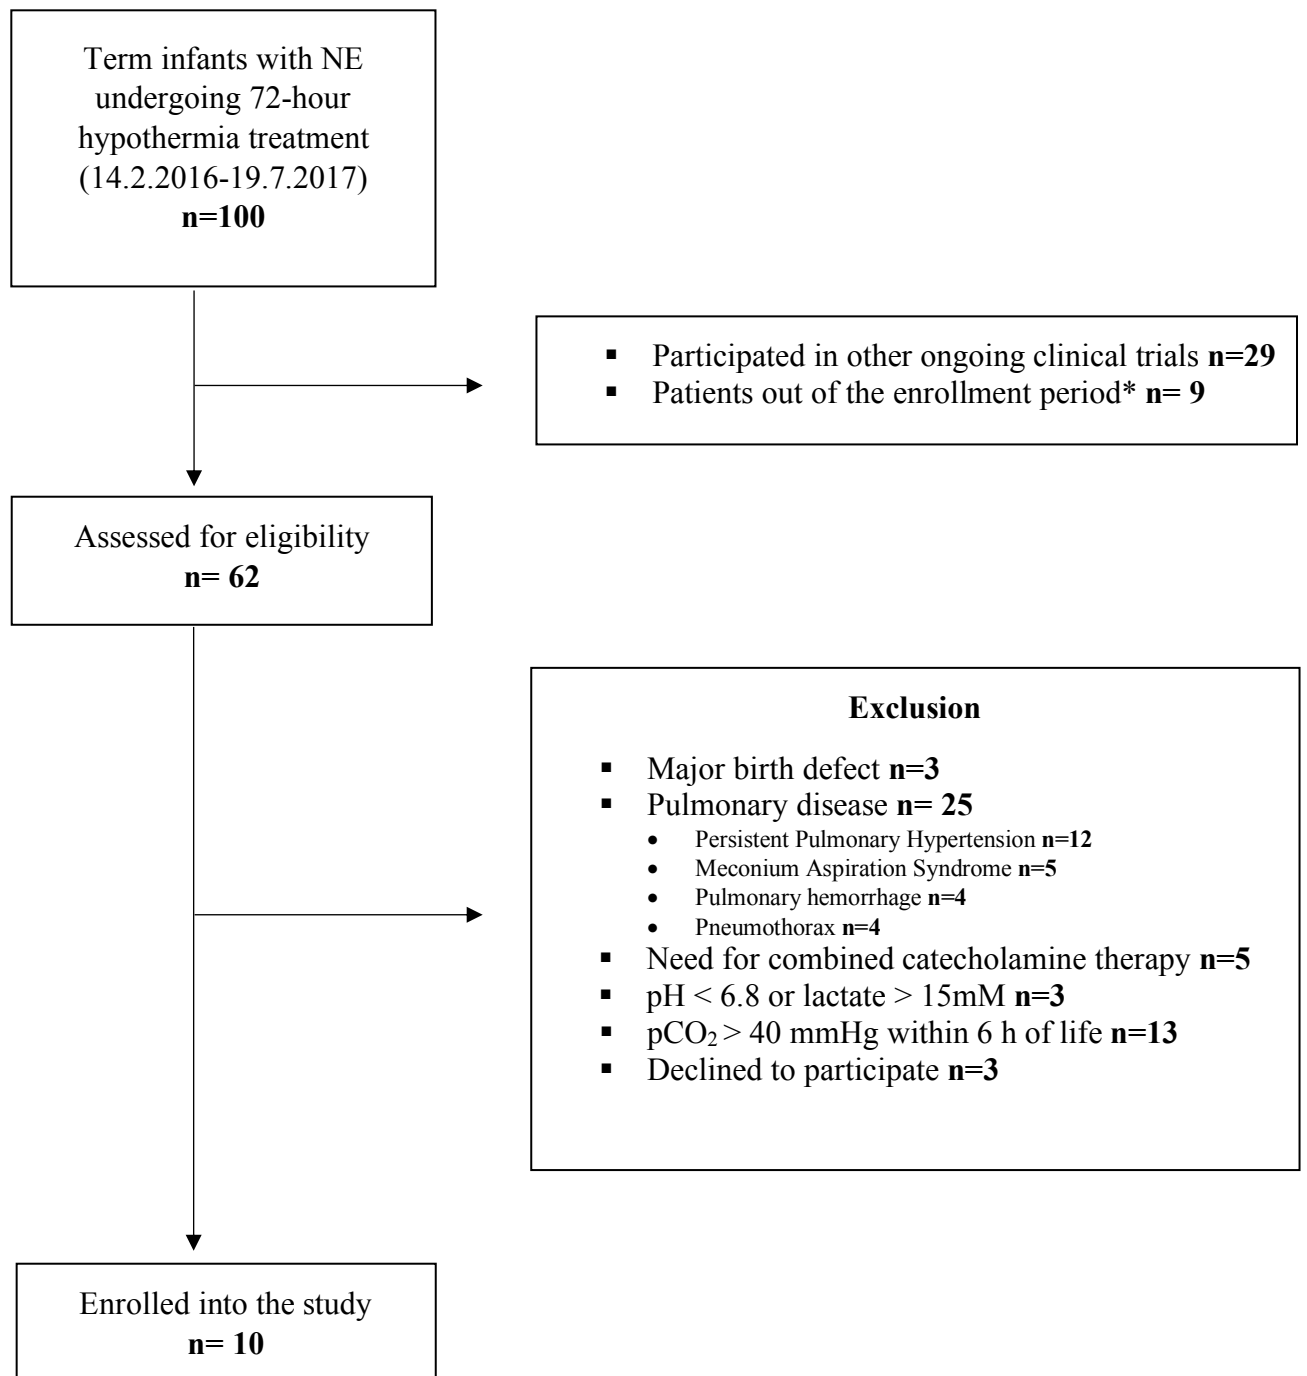

\* Enrollment was suspended briefly after each patient, while four independent neonatologists reviewed the data of the latest study participant and permitted the continuation of the study.
